# Supplementary material for: Heterogeneous reaction of ClONO 2 with TiO 2 and SiO 2 aerosol particles: implications for stratospheric particle injection for climate engineering
Source: Copernicus journal article supplement (doi:10.5194/acp-2016-756), 2016-08-23
Supplement: Supplementary file 1 [file acp-2016-756-supplement.pdf]

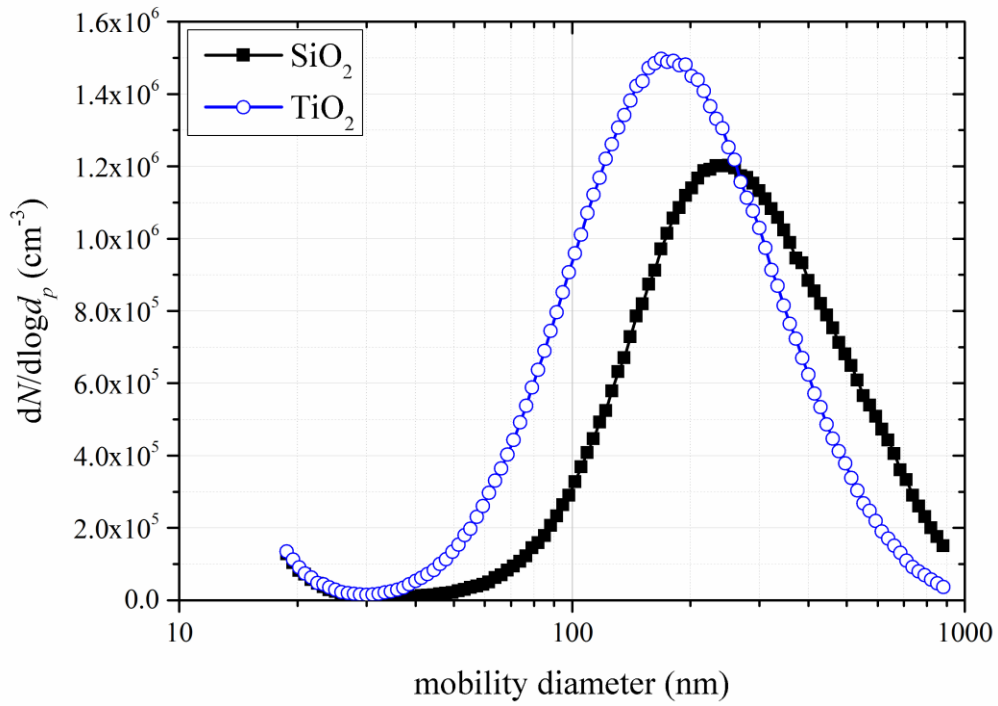

1

2 **Figure S1.** Typical number size distributions of SiO<sub>2</sub> and TiO<sub>2</sub> aerosol particles used in in

3 this study.

4

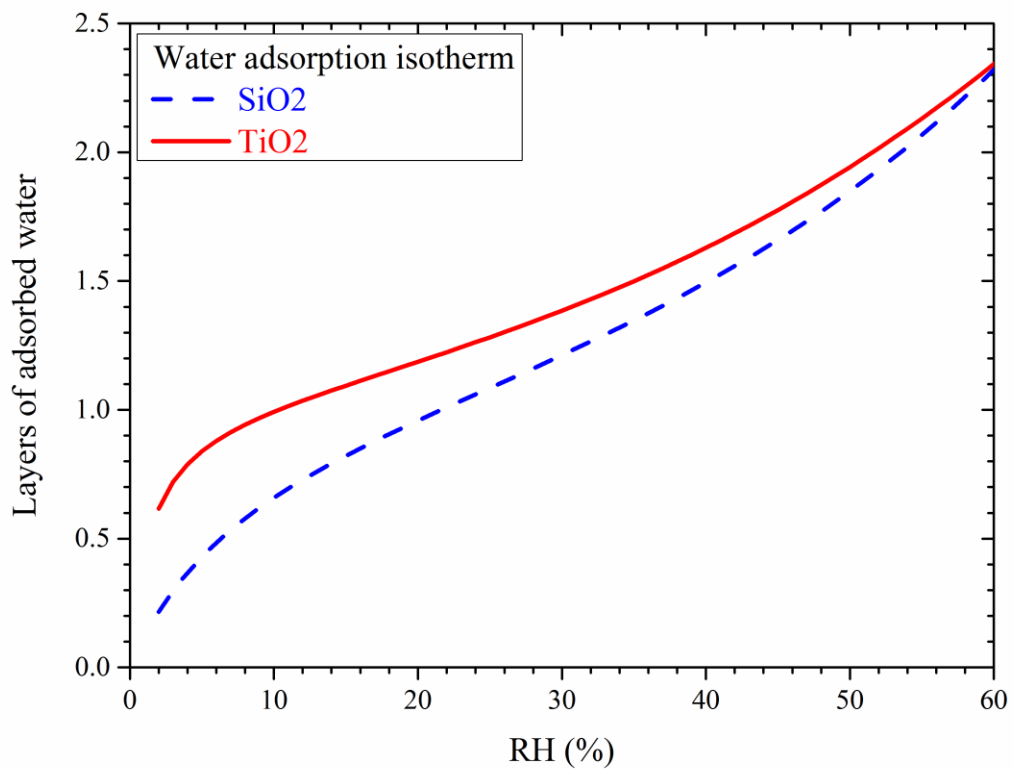

5  
6 **Figure S2.** Water adsorption on SiO<sub>2</sub> and TiO<sub>2</sub> particles at different RH, reported by  
7 Goodman et al. (2001).

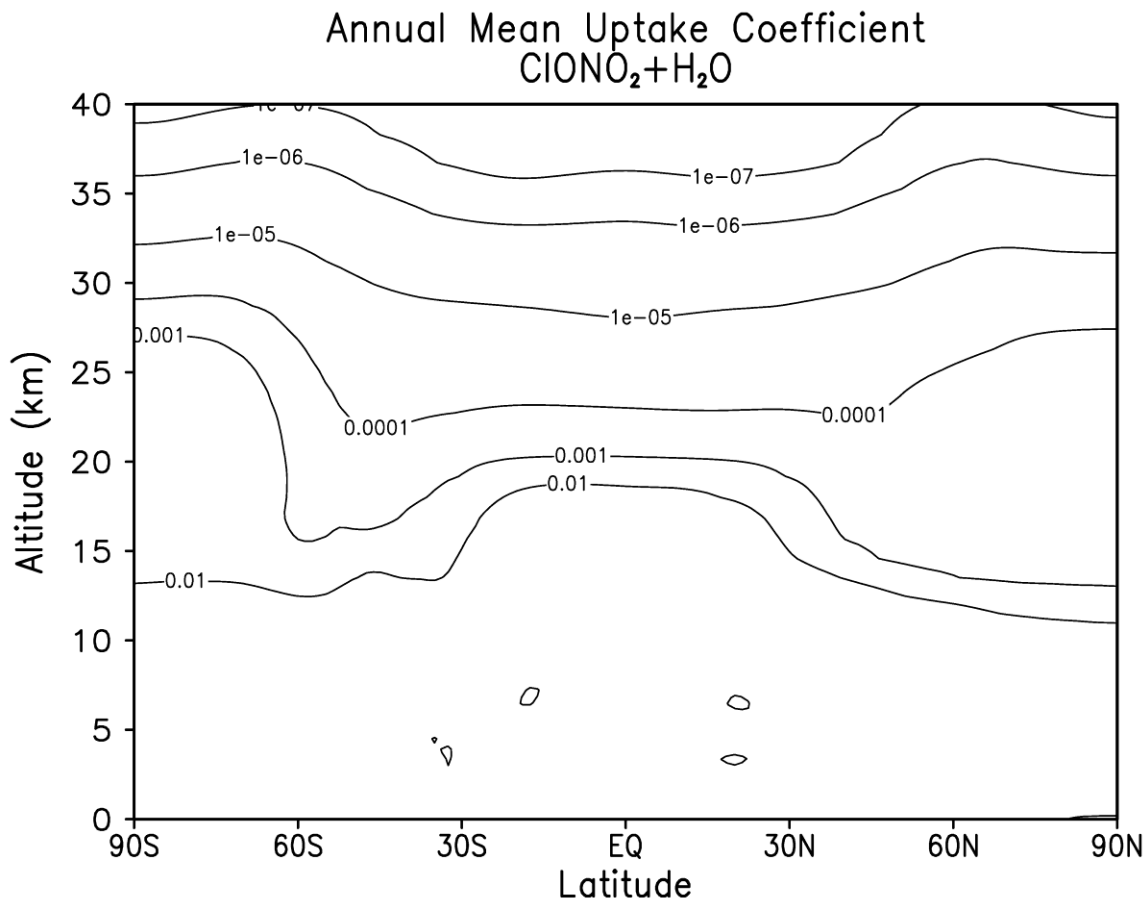

8

9 **Figure S3.** Uptake coefficients of ClONO<sub>2</sub> on sulfuric acid particles in the stratosphere for

10 the reaction ClONO<sub>2</sub> + H<sub>2</sub>O + surface → HNO<sub>3</sub> + HOCl.

11 **Reference:**

- 12 Goodman, A. L., Bernard, E. T., and Grassian, V. H.: Spectroscopic study of nitric acid  
13 and water adsorption on oxide particles: Enhanced nitric acid uptake kinetics in the  
14 presence of adsorbed water, *J. Phys. Chem. A*, 105, 6443-6457, 2001.
